# Supplementary material for: Microbial Gene Abundance and Expression Patterns across a River to Ocean Salinity Gradient
Source: PLOS journal article supplement (doi:10.1371/journal.pone.0140578), 2015-11-04

# S3 Fig. Manganese transporter gene abundance and expression.

Abundance (a) and expression (b) of two common manganese transporters, *mntH* and *sitABCD* across salinity.

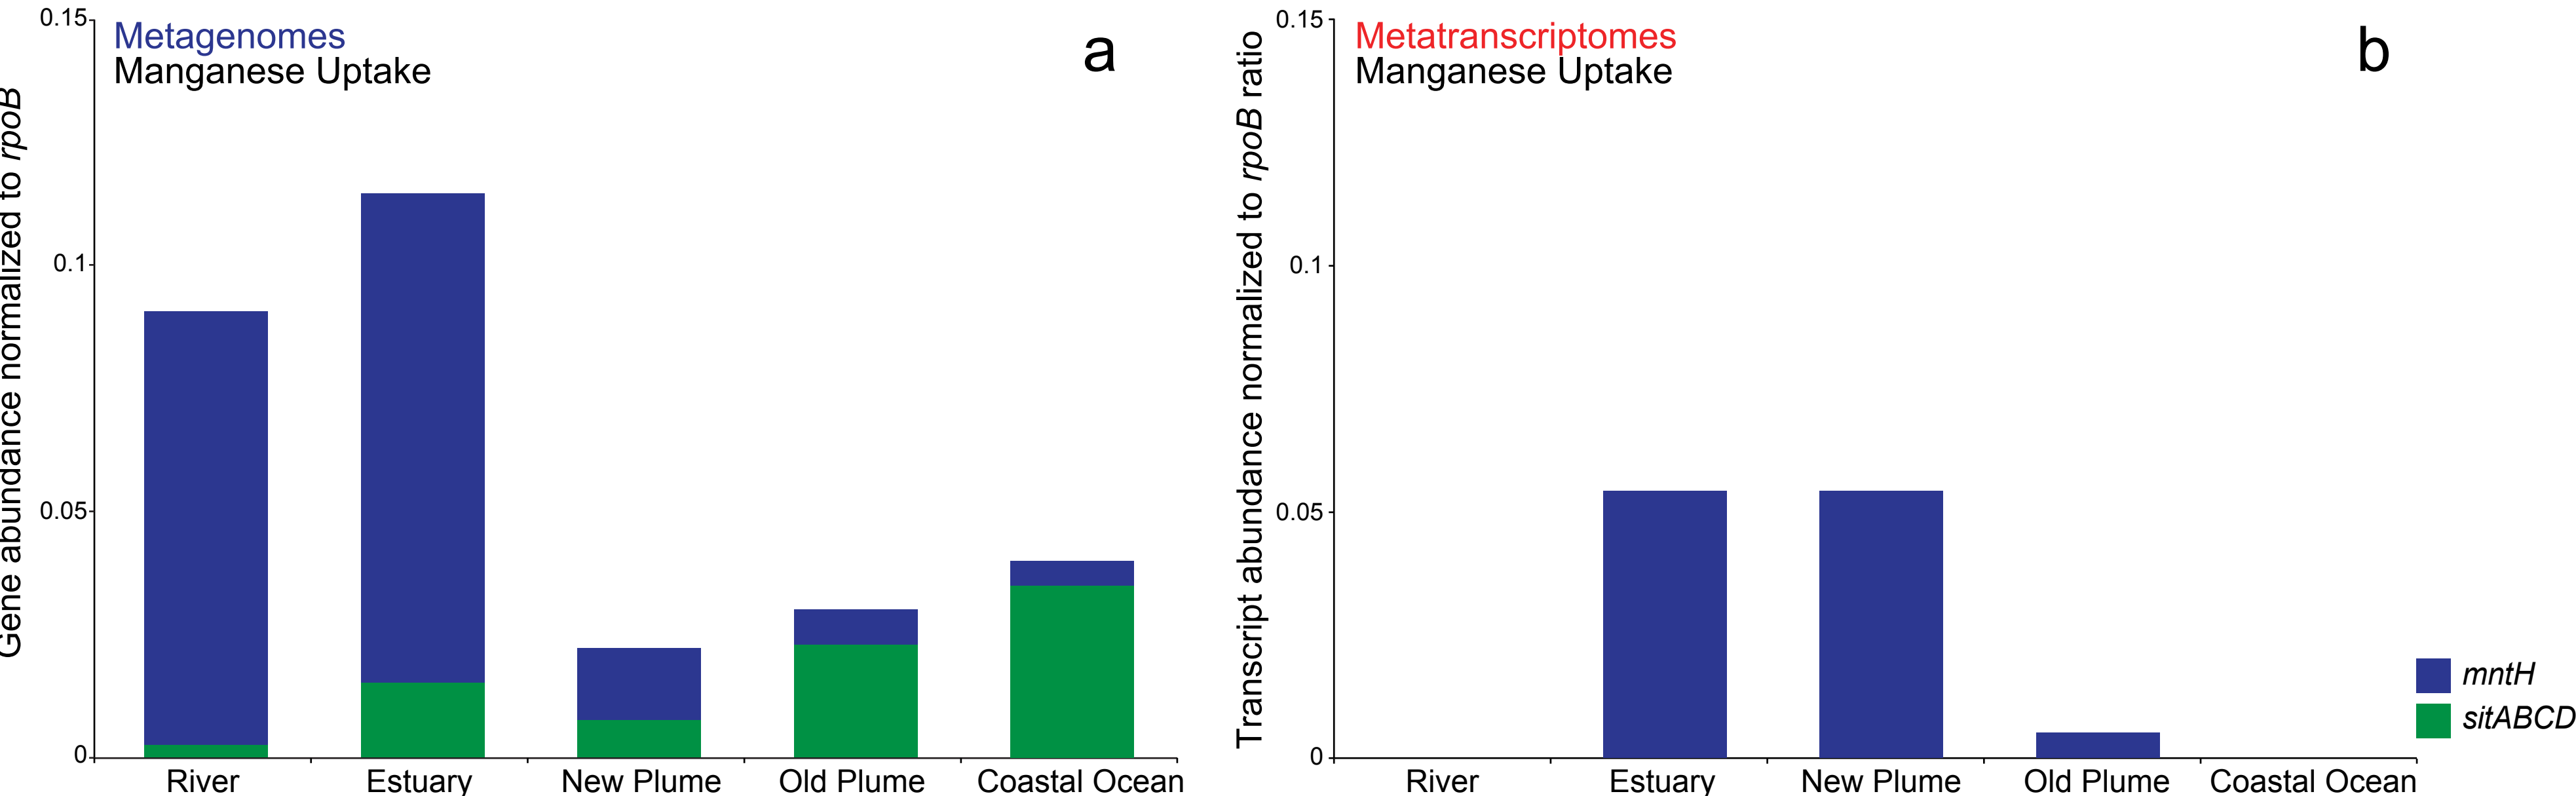

Supplement: S3 (10.1371/journal.pone.0140578.s003) [file journal.pone.0140578.s003]
